# Supplementary material for: Investigating Tetanus, Diphtheria, Acellular Pertussis Vaccination During Pregnancy and Risk of Congenital Anomalies
Source: Springer Nature journal article supplement (doi:10.1007/s40121-022-00731-8), 2022-12-15

## **Investigating tetanus, diphtheria, acellular pertussis vaccination during pregnancy and risk of congenital anomalies**

Journal: *Infectious Diseases and Therapy*

Ana Florea<sup>a\*</sup>, Lina S. Sy<sup>a</sup>, Bradley K. Ackerson<sup>b</sup>, Lei Qian<sup>a</sup>, Yi Luo<sup>a</sup>, Tracy Becerra-Culqui<sup>a,c</sup>, Gina S. Lee<sup>a</sup>, Yun Tian<sup>a,d</sup>, Chengyi Zheng<sup>a</sup>, Radha Bathala<sup>a</sup>, Sara Y. Tartof<sup>a,e</sup>, Laura Campora<sup>f</sup>, Maria Angeles Ceregido<sup>f</sup>, Anastasia Kuznetsova<sup>f</sup>, Jean-Etienne Poirrier<sup>f,g</sup>, Dominique Rosillon<sup>f,h</sup>, Laura Valdes<sup>f</sup>, Brigitte Cheuvart<sup>f</sup>, Narcisa Mesaros<sup>f,i</sup>, Nadia Meyer<sup>f</sup>, Adrienne Guignard<sup>f</sup>, Hung-Fu Tseng<sup>a,e</sup>

### **Affiliations:**

- a. Department of Research and Evaluation, Kaiser Permanente Southern California, Pasadena, CA, USA*
- b. Pediatrics and Pediatric Infectious Diseases, Southern California Permanente Medical Group, Harbor City, CA, USA*
- c. Present address: Department of Occupational Therapy, California State University, Dominguez Hills, Carson, CA, USA*
- d. Present address: Pharmaceutical Product Development, Thermo Fisher Scientific, Wilmington, NC, USA*
- e. Kaiser Permanente Bernard J. Tyson School of Medicine, Pasadena, CA, USA*
- f. GSK Vaccines, Wavre, Belgium*
- g. Present address: Parexel International, Wavre, Belgium*
- h. Present address: DESiRE-Consulting, Sorée, Belgium*
- i. Present address: The Janssens pharmaceutical companies of Johnson & Johnson, Beerse, Belgium*

**\*Corresponding Author:** Ana Florea, PhD, Department of Research and Evaluation, Southern California Permanente Medical Group, Kaiser Permanente. 100 S Los Robles Ave, 2nd Floor, Pasadena, CA 91101. Tel: 626-564-7532, Email: [Ana.Florea@kp.org](mailto:Ana.Florea@kp.org)

## Table of Contents

|                                                                               |    |
|-------------------------------------------------------------------------------|----|
| <b>Secular Trend Plots Supplementary Methods</b> .....                        | 4  |
| <b>Supplementary Tables</b> .....                                             | 5  |
| <b>Table S1. Congenital Anomalies Of Eye</b> .....                            | 6  |
| <b>Table S2. Congenital Anomalies Of Ear, Face, And Neck</b> .....            | 8  |
| <b>Table S3. Congenital Anomalies Of Respiratory System</b> .....             | 9  |
| <b>Table S4. Congenital Anomalies Of Upper Gastrointestinal System</b> .....  | 10 |
| <b>Table S5. Congenital Anomalies Of Genital Organs</b> .....                 | 11 |
| <b>Table S6. Congenital Anomalies Of Renal System</b> .....                   | 13 |
| <b>Table S7. Congenital Anomalies Of Musculoskeletal System</b> .....         | 15 |
| <b>Table S8. Congenital Anomalies Of Integument</b> .....                     | 18 |
| <b>Supplementary Figures</b> .....                                            | 19 |
| <b>Figure S1. Congenital Anomalies of Nervous System</b> .....                | 20 |
| <b>Figure S2. Congenital Anomalies of Eye</b> .....                           | 21 |
| <b>Figure S3. Congenital Anomalies of Ear, Face, and Neck</b> .....           | 22 |
| <b>Figure S4. Congenital Anomalies of Cardiovascular System</b> .....         | 23 |
| <b>Figure S5. Congenital Anomalies of Respiratory System</b> .....            | 24 |
| <b>Figure S6. Clefts</b> .....                                                | 25 |
| <b>Figure S7. Congenital Anomalies of Upper Gastrointestinal System</b> ..... | 26 |
| <b>Figure S8. Congenital Anomalies of Lower Gastrointestinal System</b> ..... | 27 |
| <b>Figure S9. Congenital Anomalies of Genital System</b> .....                | 28 |
| <b>Figure S10. Congenital Anomalies of Renal System</b> .....                 | 29 |
| <b>Figure S11. Congenital Anomalies of Musculoskeletal System</b> .....       | 30 |
| <b>Figure S12. Congenital Anomalies of Limb</b> .....                         | 31 |
| <b>Figure S13. Congenital Anomalies of Integument</b> .....                   | 32 |
| <b>Figure S14. Other and Unspecified Congenital Anomalies</b> .....           | 33 |

## **Supplementary Material**

### **Secular Trend Plots Supplementary Methods**

The rates of events were calculated and plotted between January 2011 and March 2020 as the number of events of a specific congenital anomaly body system per 1,000 Kaiser Permanente Southern California (KPSC) live-born infants. The infants and their congenital anomaly events were aggregated by birth year and month. Only one event per infant was counted. The red line represents the 6-month moving average. The gray horizontal lines represent the mean, mean + 2 standard deviations, and mean + 3 standard deviations. The vertical gray lines represent the time of the International Classification of Diseases (ICD)-10 transition (OCT2015), the first birth date of infants in the historical cohort (JAN2012), the last birth date of infants in the historical cohort (OCT2015), the first birth date of infants in the exposed cohort (FEB2018), and the last birth date of infants in the exposed cohort (MAY2019). These secular trends were based on automated data (ICD-9 and ICD-10 codes) and have not been chart-reviewed.

## **Supplementary Tables**

International Classification of Diseases (ICD)-9 and -10 diagnosis codes and descriptions associated with congenital anomalies with elevated adjusted relative risks.

Due to the transition from ICD-9 to ICD-10 codes, there may be different descriptions for the same diagnosis. For example, in Table S1, the codes 743.65 and Q10.5 describe the same congenital anomaly.

**Table S1. Congenital Anomalies Of Eye**

| ICD diagnosis code and description                                    | Exposed<br>(N=16,350)           | Unexposed<br>(N=16,088)       |
|-----------------------------------------------------------------------|---------------------------------|-------------------------------|
|                                                                       | Number of events<br>N=1,142 (%) | Number of events<br>N=973 (%) |
| <b>ICD-9 codes</b>                                                    |                                 |                               |
| 743.10, MICROPHTHALMOS, UNSPECIFIED                                   | 0 (0.00)                        | 1 (0.10)                      |
| 743.30, CONGENITAL CATARACT, UNSPECIFIED                              | 0 (0.00)                        | 4 (0.41)                      |
| 743.31, CONGENITAL CAPSULAR AND SUBCAPSULAR CATARACT                  | 0 (0.00)                        | 2 (0.21)                      |
| 743.43, OTHER CORNEAL OPACITIES, CONGENITAL                           | 0 (0.00)                        | 1 (0.10)                      |
| 743.46, OTHER SPECIFIED CONGENITAL ANOMALIES OF IRIS AND CILIARY BODY | 0 (0.00)                        | 3 (0.31)                      |
| 743.51, VITREOUS ANOMALIES                                            | 0 (0.00)                        | 1 (0.10)                      |
| 743.61, CONGENITAL PTOSIS                                             | 0 (0.00)                        | 8 (0.82)                      |
| 743.62, CONGENITAL DEFORMITIES OF EYELIDS                             | 0 (0.00)                        | 11 (1.13)                     |
| 743.63, OTHER SPECIFIED CONGENITAL ANOMALIES OF EYELID                | 0 (0.00)                        | 24 (2.47)                     |
| 743.65, SPECIFIED CONGENITAL ANOMALIES OF LACRIMAL PASSAGES           | 0 (0.00)                        | 888 (91.26)                   |
| 743.8, OTHER SPECIFIED ANOMALIES OF EYE                               | 0 (0.00)                        | 2 (0.21)                      |
| 743.9, UNSPECIFIED ANOMALY OF EYE                                     | 0 (0.00)                        | 18 (1.85)                     |
| <b>ICD-10 codes</b>                                                   |                                 |                               |
| Q10.0, CONGENITAL PTOSIS                                              | 13 (1.14)                       | 0 (0.00)                      |
| Q10.2, CONGENITAL ENTROPION                                           | 3 (0.26)                        | 0 (0.00)                      |
| Q10.3, OTHER CONGENITAL MALFORMATIONS OF EYELID                       | 45 (3.94)                       | 2 (0.21)                      |
| Q10.5, CONGENITAL STENOSIS AND STRICTURE OF LACRIMAL DUCT             | 1,066 (93.35)                   | 11 (1.13)                     |
| Q10.6, OTHER CONGENITAL MALFORMATIONS OF LACRIMAL APPARATUS           | 1 (0.09)                        | 0 (0.00)                      |
| Q11.2, MICROPHTHALMOS                                                 | 1 (0.09)                        | 0 (0.00)                      |
| Q12.0, CONGENITAL CATARACT                                            | 3 (0.26)                        | 0 (0.00)                      |
| Q13.0, COLOBOMA OF IRIS                                               | 2 (0.18)                        | 0 (0.00)                      |
| Q13.5, BLUE SCLERA                                                    | 1 (0.09)                        | 0 (0.00)                      |
| Q14.1, CONGENITAL MALFORMATION OF RETINA                              | 1 (0.09)                        | 0 (0.00)                      |
| Q14.8, OTHER CONGENITAL MALFORMATIONS OF POSTERIOR SEGMENT OF EYE     | 2 (0.18)                        | 0 (0.00)                      |
| Q15.0, CONGENITAL GLAUCOMA                                            | 3 (0.26)                        | 0 (0.00)                      |

| <b>ICD diagnosis code and description</b>              | <b>Exposed</b>          | <b>Unexposed</b>        |
|--------------------------------------------------------|-------------------------|-------------------------|
|                                                        | <b>(N=16,350)</b>       | <b>(N=16,088)</b>       |
|                                                        | <b>Number of events</b> | <b>Number of events</b> |
|                                                        | <b>N=1,142 (%)</b>      | <b>N=973 (%)</b>        |
| Q15.8, OTHER SPECIFIED CONGENITAL MALFORMATIONS OF EYE | 1 (0.09)                | 0 (0.00)                |
| Q15.9, CONGENITAL MALFORMATION OF EYE, UNSPECIFIED     | 7 (0.61)                | 1 (0.10)                |

**Table S2. Congenital Anomalies Of Ear, Face, And Neck**

| ICD diagnosis code and description                                            | Exposed<br>(N=16,350)         | Unexposed<br>(N=16,088)       |
|-------------------------------------------------------------------------------|-------------------------------|-------------------------------|
|                                                                               | Number of events<br>N=266 (%) | Number of events<br>N=131 (%) |
| <b>ICD-9 Codes</b>                                                            |                               |                               |
| 744.1, ACCESSORY AURICLE                                                      | 0 (0.00)                      | 55 (41.98)                    |
| 744.22, MACROTIA                                                              | 0 (0.00)                      | 2 (1.53)                      |
| 744.23, MICROTIA                                                              | 0 (0.00)                      | 4 (3.05)                      |
| 744.29, OTHER SPECIFIED ANOMALIES OF EAR                                      | 0 (0.00)                      | 10 (7.63)                     |
| 744.3, UNSPECIFIED ANOMALY OF EAR                                             | 0 (0.00)                      | 23 (17.56)                    |
| 744.42, BRANCHIAL CLEFT CYST                                                  | 0 (0.00)                      | 1 (0.76)                      |
| 744.46, PREAURICULAR SINUS OR FISTULA                                         | 0 (0.00)                      | 17 (12.98)                    |
| 744.47, PREAURICULAR CYST                                                     | 0 (0.00)                      | 5 (3.82)                      |
| 744.49, OTHER BRANCHIAL CLEFT CYST OR FISTULA; PREAURICULAR SINUS             | 0 (0.00)                      | 3 (2.29)                      |
| 744.83, MACROSTOMIA                                                           | 0 (0.00)                      | 1 (0.76)                      |
| 744.84, MICROSTOMIA                                                           | 0 (0.00)                      | 1 (0.76)                      |
| 744.89, OTHER SPECIFIED CONGENITAL ANOMALIES OF FACE AND NECK                 | 0 (0.00)                      | 3 (2.29)                      |
| 744.9, UNSPECIFIED CONGENITAL ANOMALIES OF FACE AND NECK                      | 0 (0.00)                      | 8 (6.11)                      |
| <b>ICD-10 Codes</b>                                                           |                               |                               |
| Q16.1, CONGENITAL ABSENCE, ATRESIA AND STRICTURE OF AUDITORY CANAL (EXTERNAL) | 4 (1.50)                      | 0 (0.00)                      |
| Q17.0, ACCESSORY AURICLE                                                      | 78 (29.32)                    | 0 (0.00)                      |
| Q17.2, MICROTIA                                                               | 5 (1.88)                      | 0 (0.00)                      |
| Q17.3, OTHER MISSHAPEN EAR                                                    | 26 (9.77)                     | 0 (0.00)                      |
| Q17.4, MISPLACED EAR                                                          | 2 (0.75)                      | 0 (0.00)                      |
| Q17.8, OTHER SPECIFIED CONGENITAL MALFORMATIONS OF EAR                        | 30 (11.28)                    | 0 (0.00)                      |
| Q17.9, CONGENITAL MALFORMATION OF EAR, UNSPECIFIED                            | 75 (28.20)                    | 0 (0.00)                      |
| Q18.0, SINUS, FISTULA AND CYST OF BRANCHIAL CLEFT                             | 3 (1.13)                      | 0 (0.00)                      |
| Q18.1, PREAURICULAR SINUS AND CYST                                            | 40 (15.04)                    | 0 (0.00)                      |
| Q18.3, WEBBING OF NECK                                                        | 1 (0.38)                      | 0 (0.00)                      |
| Q18.8, OTHER SPECIFIED CONGENITAL MALFORMATIONS OF FACE AND NECK              | 5 (1.88)                      | 0 (0.00)                      |
| Q18.9, CONGENITAL MALFORMATION OF FACE AND NECK, UNSPECIFIED                  | 3 (1.13)                      | 0 (0.00)                      |



**Table S3. Congenital Anomalies Of Respiratory System**

| ICD diagnosis code and description                                | Exposed<br>(N=16,350)         | Unexposed<br>(N=16,088)       |
|-------------------------------------------------------------------|-------------------------------|-------------------------------|
|                                                                   | Number of events<br>N=225 (%) | Number of events<br>N=166 (%) |
| <b>ICD-9 Codes</b>                                                |                               |                               |
| 748.0, CHOANAL ATRESIA                                            | 0 (0.00)                      | 2 (1.20)                      |
| 748.1, OTHER ANOMALIES OF NOSE                                    | 0 (0.00)                      | 7 (4.22)                      |
| 748.3, OTHER ANOMALIES OF LARYNX, TRACHEA, AND BRONCHUS           | 0 (0.00)                      | 146 (87.95)                   |
| 748.5, AGENESIS, HYPOPLASIA, AND DYSPLASIA OF LUNG                | 0 (0.00)                      | 6 (3.61)                      |
| 748.60, ANOMALY OF LUNG, UNSPECIFIED                              | 0 (0.00)                      | 1 (0.60)                      |
| <b>ICD-10 Codes</b>                                               |                               |                               |
| Q30.0, CHOANAL ATRESIA                                            | 4 (1.78)                      | 0 (0.00)                      |
| Q31.5, CONGENITAL LARYNGOMALACIA                                  | 196 (87.11)                   | 5 (3.01)                      |
| Q31.9, CONGENITAL MALFORMATION OF LARYNX, UNSPECIFIED             | 1 (0.44)                      | 0 (0.00)                      |
| Q32.0, CONGENITAL TRACHEOMALACIA                                  | 6 (2.67)                      | 0 (0.00)                      |
| Q32.1, OTHER CONGENITAL MALFORMATIONS OF TRACHEA                  | 1 (0.44)                      | 0 (0.00)                      |
| Q32.2, CONGENITAL BRONCHOMALACIA                                  | 1 (0.44)                      | 0 (0.00)                      |
| Q33.0, CONGENITAL CYSTIC LUNG                                     | 2 (0.89)                      | 0 (0.00)                      |
| Q33.6, CONGENITAL HYPOPLASIA AND DYSPLASIA OF LUNG                | 13 (5.78)                     | 0 (0.00)                      |
| Q33.9, CONGENITAL MALFORMATION OF LUNG, UNSPECIFIED               | 4 (1.78)                      | 0 (0.00)                      |
| Q34.9, CONGENITAL MALFORMATION OF RESPIRATORY SYSTEM, UNSPECIFIED | 1 (0.44)                      | 0 (0.00)                      |

**Table S4. Congenital Anomalies Of Upper Gastrointestinal System**

| ICD diagnosis code and description                                  | Exposed<br>(N=16,350)           | Unexposed<br>(N=16,088)       |
|---------------------------------------------------------------------|---------------------------------|-------------------------------|
|                                                                     | Number of events<br>N=1,109 (%) | Number of events<br>N=609 (%) |
| <b>ICD-9 Codes</b>                                                  |                                 |                               |
| 750.0, TONGUE TIE                                                   | 0 (0.00)                        | 563 (92.45)                   |
| 750.26, OTHER SPECIFIED ANOMALIES OF MOUTH                          | 0 (0.00)                        | 6 (0.99)                      |
| 750.3, TRACHEOESOPHAGEAL FISTULA, ESOPHAGEAL ATRESIA AND STENOSIS   | 0 (0.00)                        | 7 (1.15)                      |
| 750.5, CONGENITAL HYPERTROPHIC PYLORIC STENOSIS                     | 0 (0.00)                        | 26 (4.27)                     |
| 750.6, CONGENITAL HIATUS HERNIA                                     | 0 (0.00)                        | 1 (0.16)                      |
| 750.9, UNSPECIFIED ANOMALY OF UPPER ALIMENTARY TRACT                | 0 (0.00)                        | 4 (0.66)                      |
| <b>ICD-10 Codes</b>                                                 |                                 |                               |
| Q38.0, CONGENITAL MALFORMATIONS OF LIPS, NOT ELSEWHERE CLASSIFIED   | 7 (0.63)                        | 0 (0.00)                      |
| Q38.1, ANKYLOGLOSSIA                                                | 1,063 (95.85)                   | 3 (0.49)                      |
| Q38.2, MACROGLOSSIA                                                 | 4 (0.36)                        | 0 (0.00)                      |
| Q38.3, OTHER CONGENITAL MALFORMATIONS OF TONGUE                     | 3 (0.27)                        | 0 (0.00)                      |
| Q38.4, CONGENITAL MALFORMATIONS OF SALIVARY GLANDS AND DUCTS        | 4 (0.36)                        | 0 (0.00)                      |
| Q38.5, CONGENITAL MALFORMATIONS OF PALATE, NOT ELSEWHERE CLASSIFIED | 4 (0.36)                        | 0 (0.00)                      |
| Q38.6, OTHER CONGENITAL MALFORMATIONS OF MOUTH                      | 3 (0.27)                        | 0 (0.00)                      |
| Q39.1, ATRESIA OF ESOPHAGUS WITH TRACHEO-ESOPHAGEAL FISTULA         | 1 (0.09)                        | 0 (0.00)                      |
| Q40.0, CONGENITAL HYPERTROPHIC PYLORIC STENOSIS                     | 22 (1.98)                       | 0 (0.00)                      |

**Table S5. Congenital Anomalies Of Genital Organs**

| ICD diagnosis code and description                                           | Exposed<br>(N=16,350)         | Unexposed<br>(N=16,088)       |
|------------------------------------------------------------------------------|-------------------------------|-------------------------------|
|                                                                              | Number of events<br>N=355 (%) | Number of events<br>N=297 (%) |
| <b>ICD-9 Codes</b>                                                           |                               |                               |
| 752.40, UNSPECIFIED ANOMALY OF CERVIX, VAGINA, AND EXTERNAL FEMALE GENITALIA | 0 (0.00)                      | 1 (0.34)                      |
| 752.42, IMPERFORATE HYMEN                                                    | 0 (0.00)                      | 2 (0.67)                      |
| 752.45, VAGINAL AGENESIS                                                     | 0 (0.00)                      | 1 (0.34)                      |
| 752.49, OTHER ANOMALIES OF CERVIX, VAGINA, AND EXTERNAL FEMALE GENITALIA     | 0 (0.00)                      | 35 (11.78)                    |
| 752.51, UNDESCENDED TESTIS                                                   | 0 (0.00)                      | 103 (34.68)                   |
| 752.52, RETRACTILE TESTIS                                                    | 0 (0.00)                      | 6 (2.02)                      |
| 752.61, HYPOSPADIAS                                                          | 0 (0.00)                      | 73 (24.58)                    |
| 752.63, CONGENITAL CHORDEE                                                   | 0 (0.00)                      | 11 (3.70)                     |
| 752.64, MICROPENIS                                                           | 0 (0.00)                      | 2 (0.67)                      |
| 752.65, HIDDEN PENIS                                                         | 0 (0.00)                      | 24 (8.08)                     |
| 752.69, OTHER PENILE ANOMALIES                                               | 0 (0.00)                      | 40 (13.47)                    |
| 752.7, INDETERMINATE SEX AND PSEUDOHERMAPHRODITISM                           | 0 (0.00)                      | 1 (0.34)                      |
| 752.89, OTHER SPECIFIED ANOMALIES OF GENITAL ORGANS                          | 0 (0.00)                      | 5 (1.68)                      |
| 752.9, UNSPECIFIED ANOMALY OF GENITAL ORGANS                                 | 0 (0.00)                      | 3 (1.01)                      |
| <b>ICD-10 Codes</b>                                                          |                               |                               |
| Q52.10, DOUBLING OF VAGINA, UNSPECIFIED                                      | 1 (0.28)                      | 0 (0.00)                      |
| Q52.4, OTHER CONGENITAL MALFORMATIONS OF VAGINA                              | 1 (0.28)                      | 0 (0.00)                      |
| Q52.5, FUSION OF LABIA                                                       | 32 (9.01)                     | 2 (0.67)                      |
| Q53.10, UNSPECIFIED UNDESCENDED TESTICLE, UNILATERAL                         | 80 (22.54)                    | 1 (0.34)                      |
| Q53.112, UNILATERAL INGUINAL TESTIS                                          | 6 (1.69)                      | 0 (0.00)                      |
| Q53.13, UNILATERAL HIGH SCROTAL TESTIS                                       | 4 (1.13)                      | 0 (0.00)                      |
| Q53.20, UNDESCENDED TESTICLE, UNSPECIFIED, BILATERAL                         | 17 (4.79)                     | 0 (0.00)                      |
| Q53.212, BILATERAL INGUINAL TESTES                                           | 4 (1.13)                      | 0 (0.00)                      |
| Q53.9, UNDESCENDED TESTICLE, UNSPECIFIED                                     | 20 (5.63)                     | 0 (0.00)                      |
| Q54.0, HYPOSPADIAS, BALANIC                                                  | 3 (0.85)                      | 0 (0.00)                      |
| Q54.1, HYPOSPADIAS, PENILE                                                   | 4 (1.13)                      | 0 (0.00)                      |

| <b>ICD diagnosis code and description</b>                              | <b>Exposed</b>          | <b>Unexposed</b>        |
|------------------------------------------------------------------------|-------------------------|-------------------------|
|                                                                        | <b>(N=16,350)</b>       | <b>(N=16,088)</b>       |
|                                                                        | <b>Number of events</b> | <b>Number of events</b> |
|                                                                        | <b>N=355 (%)</b>        | <b>N=297 (%)</b>        |
| Q54.2, HYPOSPADIAS, PENOSCROTAL                                        | 1 (0.28)                | 0 (0.00)                |
| Q54.4, CONGENITAL CHORDEE                                              | 21 (5.92)               | 0 (0.00)                |
| Q54.9, HYPOSPADIAS, UNSPECIFIED                                        | 50 (14.08)              | 0 (0.00)                |
| Q55.0, ABSENCE AND APLASIA OF TESTIS                                   | 1 (0.28)                | 0 (0.00)                |
| Q55.22, RETRACTILE TESTIS                                              | 11 (3.10)               | 0 (0.00)                |
| Q55.29, OTHER CONGENITAL MALFORMATIONS OF TESTIS AND SCROTUM           | 1 (0.28)                | 0 (0.00)                |
| Q55.61, CURVATURE OF PENIS (LATERAL)                                   | 7 (1.97)                | 0 (0.00)                |
| Q55.62, HYPOPLASIA OF PENIS                                            | 8 (2.25)                | 0 (0.00)                |
| Q55.63, CONGENITAL TORSION OF PENIS                                    | 35 (9.86)               | 0 (0.00)                |
| Q55.64, HIDDEN PENIS                                                   | 46 (12.96)              | 0 (0.00)                |
| Q55.69, OTHER CONGENITAL MALFORMATION OF PENIS                         | 11 (3.10)               | 0 (0.00)                |
| Q55.8, OTHER SPECIFIED CONGENITAL MALFORMATIONS OF MALE GENITAL ORGANS | 4 (1.13)                | 0 (0.00)                |
| Q56.4, INDETERMINATE SEX, UNSPECIFIED                                  | 5 (1.41)                | 0 (0.00)                |

**Table S6. Congenital Anomalies Of Renal System**

| ICD diagnosis code and description                                | Exposed<br>(N=16,350)         | Unexposed<br>(N=16,088)      |
|-------------------------------------------------------------------|-------------------------------|------------------------------|
|                                                                   | Number of events<br>N=128 (%) | Number of events<br>N=95 (%) |
| <b>ICD-9 Codes</b>                                                |                               |                              |
| 753.0, RENAL AGENESIS AND DYSGENESIS                              | 0 (0.00)                      | 6 (6.32)                     |
| 753.11, CONGENITAL SINGLE RENAL CYST                              | 0 (0.00)                      | 3 (3.16)                     |
| 753.12, POLYCYSTIC KIDNEY, UNSPECIFIED TYPE                       | 0 (0.00)                      | 2 (2.11)                     |
| 753.14, POLYCYSTIC KIDNEY, AUTOSOMAL RECESSIVE                    | 0 (0.00)                      | 2 (2.11)                     |
| 753.15, RENAL DYSPLASIA                                           | 0 (0.00)                      | 3 (3.16)                     |
| 753.19, OTHER SPECIFIED CYSTIC KIDNEY DISEASE                     | 0 (0.00)                      | 5 (5.26)                     |
| 753.20, UNSPECIFIED OBSTRUCTIVE DEFECT OF RENAL PELVIS AND URETER | 0 (0.00)                      | 1 (1.05)                     |
| 753.21, CONGENITAL OBSTRUCTION OF URETEROPELVIC JUNCTION          | 0 (0.00)                      | 1 (1.05)                     |
| 753.22, CONGENITAL OBSTRUCTION OF URETEROVESICAL JUNCTION         | 0 (0.00)                      | 5 (5.26)                     |
| 753.23, CONGENITAL URETEROCELE                                    | 0 (0.00)                      | 1 (1.05)                     |
| 753.29, OTHER OBSTRUCTIVE DEFECTS OF RENAL PELVIS AND URETER      | 0 (0.00)                      | 67 (70.53)                   |
| 753.3, OTHER SPECIFIED ANOMALIES OF KIDNEY                        | 0 (0.00)                      | 8 (8.42)                     |
| 753.6, ATRESIA AND STENOSIS OF URETHRA AND BLADDER NECK           | 0 (0.00)                      | 1 (1.05)                     |
| 753.7, ANOMALIES OF URACHUS                                       | 0 (0.00)                      | 2 (2.11)                     |
| 753.9, UNSPECIFIED ANOMALY OF URINARY SYSTEM                      | 0 (0.00)                      | 6 (6.32)                     |
| <b>ICD-10 Codes</b>                                               |                               |                              |
| Q60.0, RENAL AGENESIS, UNILATERAL                                 | 4 (3.13)                      | 0 (0.00)                     |
| Q61.00, CONGENITAL RENAL CYST, UNSPECIFIED                        | 2 (1.56)                      | 0 (0.00)                     |
| Q61.3, POLYCYSTIC KIDNEY, UNSPECIFIED                             | 1 (0.78)                      | 0 (0.00)                     |
| Q61.4, RENAL DYSPLASIA                                            | 6 (4.69)                      | 0 (0.00)                     |
| Q61.9, CYSTIC KIDNEY DISEASE, UNSPECIFIED                         | 1 (0.78)                      | 0 (0.00)                     |
| Q62.0, CONGENITAL HYDRONEPHROSIS                                  | 109 (85.16)                   | 0 (0.00)                     |
| Q62.31, CONGENITAL URETEROCELE, ORTHOTOPIC                        | 3 (2.34)                      | 0 (0.00)                     |
| Q62.39, OTHER OBSTRUCTIVE DEFECTS OF RENAL PELVIS AND URETER      | 1 (0.78)                      | 0 (0.00)                     |
| Q62.7, CONGENITAL VESICO-URETERO-RENAL REFLUX                     | 3 (2.34)                      | 0 (0.00)                     |
| Q63.1, LOBULATED, FUSED AND HORSESHOE KIDNEY                      | 2 (1.56)                      | 0 (0.00)                     |

| <b>ICD diagnosis code and description</b>                     | <b>Exposed</b>          | <b>Unexposed</b>        |
|---------------------------------------------------------------|-------------------------|-------------------------|
|                                                               | <b>(N=16,350)</b>       | <b>(N=16,088)</b>       |
|                                                               | <b>Number of events</b> | <b>Number of events</b> |
|                                                               | <b>N=128 (%)</b>        | <b>N=95 (%)</b>         |
| Q63.2, ECTOPIC KIDNEY                                         | 1 (0.78)                | 0 (0.00)                |
| Q63.8, OTHER SPECIFIED CONGENITAL MALFORMATIONS OF KIDNEY     | 3 (2.34)                | 0 (0.00)                |
| Q63.9, CONGENITAL MALFORMATION OF KIDNEY, UNSPECIFIED         | 1 (0.78)                | 0 (0.00)                |
| Q64.2, CONGENITAL POSTERIOR URETHRAL VALVES                   | 1 (0.78)                | 0 (0.00)                |
| Q64.4, MALFORMATION OF URACHUS                                | 2 (1.56)                | 0 (0.00)                |
| Q64.6, CONGENITAL DIVERTICULUM OF BLADDER                     | 1 (0.78)                | 0 (0.00)                |
| Q64.79, OTHER CONGENITAL MALFORMATIONS OF BLADDER AND URETHRA | 1 (0.78)                | 0 (0.00)                |

**Table S7. Congenital Anomalies Of Musculoskeletal System**

| ICD diagnosis code and description                                          | Exposed<br>(N=16,350)         | Unexposed<br>(N=16,088)       |
|-----------------------------------------------------------------------------|-------------------------------|-------------------------------|
|                                                                             | Number of events<br>N=266 (%) | Number of events<br>N=171 (%) |
| <b>ICD-9 Codes</b>                                                          |                               |                               |
| 754.0, CONGENITAL MUSCULOSKELETAL DEFORMITIES OF SKULL, FACE, AND JAW       | 0 (0.00)                      | 23 (13.45)                    |
| 754.1, CONGENITAL MUSCULOSKELETAL DEFORMITIES OF STERNOCLEIDOMASTOID MUSCLE | 0 (0.00)                      | 8 (4.68)                      |
| 754.2, CONGENITAL MUSCULOSKELETAL DEFORMITIES OF SPINE                      | 0 (0.00)                      | 3 (1.75)                      |
| 754.30, CONGENITAL DISLOCATION OF HIP, UNILATERAL                           | 0 (0.00)                      | 8 (4.68)                      |
| 754.31, CONGENITAL DISLOCATION OF HIP, BILATERAL                            | 0 (0.00)                      | 3 (1.75)                      |
| 754.32, CONGENITAL SUBLUXATION OF HIP, UNILATERAL                           | 0 (0.00)                      | 7 (4.09)                      |
| 754.33, CONGENITAL SUBLUXATION OF HIP, BILATERAL                            | 0 (0.00)                      | 2 (1.17)                      |
| 754.41, CONGENITAL DISLOCATION OF KNEE (WITH GENU RECURVATUM)               | 0 (0.00)                      | 1 (0.58)                      |
| 754.43, CONGENITAL BOWING OF TIBIA AND FIBULA                               | 0 (0.00)                      | 1 (0.58)                      |
| 754.50, TALIPES VARUS                                                       | 0 (0.00)                      | 7 (4.09)                      |
| 754.51, TALIPES EQUINOVARUS                                                 | 0 (0.00)                      | 10 (5.85)                     |
| 754.53, METATARSUS VARUS                                                    | 0 (0.00)                      | 12 (7.02)                     |
| 754.60, TALIPES VALGUS                                                      | 0 (0.00)                      | 1 (0.58)                      |
| 754.62, TALIPES CALCANEVALGUS                                               | 0 (0.00)                      | 5 (2.92)                      |
| 754.70, TALIPES, UNSPECIFIED                                                | 0 (0.00)                      | 7 (4.09)                      |
| 754.81, PECTUS EXCAVATUM                                                    | 0 (0.00)                      | 17 (9.94)                     |
| 754.82, PECTUS CARINATUM                                                    | 0 (0.00)                      | 1 (0.58)                      |
| 754.89, OTHER SPECIFIED NONTERATOGENIC ANOMALIES                            | 0 (0.00)                      | 1 (0.58)                      |
| 756.0, ANOMALIES OF SKULL AND FACE BONES                                    | 0 (0.00)                      | 24 (14.04)                    |
| 756.10, ANOMALY OF SPINE, UNSPECIFIED                                       | 0 (0.00)                      | 1 (0.58)                      |
| 756.14, HEMIVERTEBRA                                                        | 0 (0.00)                      | 1 (0.58)                      |
| 756.3, OTHER ANOMALIES OF RIBS AND STERNUM                                  | 0 (0.00)                      | 3 (1.75)                      |
| 756.50, CONGENITAL OSTEODYSTROPHY, UNSPECIFIED                              | 0 (0.00)                      | 1 (0.58)                      |
| 756.6, ANOMALIES OF DIAPHRAGM                                               | 0 (0.00)                      | 4 (2.34)                      |
| 756.71, PRUNE BELLY SYNDROME                                                | 0 (0.00)                      | 1 (0.58)                      |
| 756.72, OMPHALOCELE                                                         | 0 (0.00)                      | 2 (1.17)                      |

| ICD diagnosis code and description                                                 | Exposed<br>(N=16,350)         | Unexposed<br>(N=16,088)       |
|------------------------------------------------------------------------------------|-------------------------------|-------------------------------|
|                                                                                    | Number of events<br>N=266 (%) | Number of events<br>N=171 (%) |
| 756.73, GASTROSCHISIS                                                              | 0 (0.00)                      | 8 (4.68)                      |
| 756.79, OTHER CONGENITAL ANOMALIES OF ABDOMINAL WALL                               | 0 (0.00)                      | 5 (2.92)                      |
| 756.89, OTHER SPECIFIED ANOMALIES OF MUSCLE, TENDON, FASCIA, AND CONNECTIVE TISSUE | 0 (0.00)                      | 7 (4.09)                      |
| <b>ICD-10 Codes</b>                                                                |                               |                               |
| Q65.01, CONGENITAL DISLOCATION OF RIGHT HIP, UNILATERAL                            | 1 (0.38)                      | 0 (0.00)                      |
| Q65.02, CONGENITAL DISLOCATION OF LEFT HIP, UNILATERAL                             | 2 (0.75)                      | 0 (0.00)                      |
| Q65.1, CONGENITAL DISLOCATION OF HIP, BILATERAL                                    | 2 (0.75)                      | 0 (0.00)                      |
| Q65.32, CONGENITAL PARTIAL DISLOCATION OF LEFT HIP, UNILATERAL                     | 4 (1.50)                      | 0 (0.00)                      |
| Q66.0, CONGENITAL TALIPES EQUINOVARUS                                              | 25 (9.40)                     | 0 (0.00)                      |
| Q66.21, CONGENITAL METATARSUS PRIMUS VARUS                                         | 2 (0.75)                      | 0 (0.00)                      |
| Q66.22, CONGENITAL METATARSUS ADDUCTUS                                             | 10 (3.76)                     | 0 (0.00)                      |
| Q66.3, OTHER CONGENITAL VARUS DEFORMITIES OF FEET                                  | 2 (0.75)                      | 0 (0.00)                      |
| Q66.4, CONGENITAL TALIPES CALCANEVALGUS                                            | 7 (2.63)                      | 0 (0.00)                      |
| Q66.6, OTHER CONGENITAL VALGUS DEFORMITIES OF FEET                                 | 1 (0.38)                      | 0 (0.00)                      |
| Q66.9, CONGENITAL DEFORMITY OF FEET, UNSPECIFIED                                   | 12 (4.51)                     | 0 (0.00)                      |
| Q67.0, CONGENITAL FACIAL ASYMMETRY                                                 | 5 (1.88)                      | 0 (0.00)                      |
| Q67.2, DOLICHOCEPHALY                                                              | 3 (1.13)                      | 1 (0.58)                      |
| Q67.3, PLAGIOCEPHALY                                                               | 39 (14.66)                    | 0 (0.00)                      |
| Q67.4, OTHER CONGENITAL DEFORMITIES OF SKULL, FACE AND JAW                         | 7 (2.63)                      | 0 (0.00)                      |
| Q67.5, CONGENITAL DEFORMITY OF SPINE                                               | 1 (0.38)                      | 0 (0.00)                      |
| Q67.6, PECTUS EXCAVATUM                                                            | 21 (7.89)                     | 0 (0.00)                      |
| Q67.7, PECTUS CARINATUM                                                            | 3 (1.13)                      | 0 (0.00)                      |
| Q68.0, CONGENITAL DEFORMITY OF STERNOCLEIDOMASTOID MUSCLE                          | 29 (10.90)                    | 1 (0.58)                      |
| Q68.1, CONGENITAL DEFORMITY OF FINGER(S) AND HAND                                  | 3 (1.13)                      | 0 (0.00)                      |
| Q68.2, CONGENITAL DEFORMITY OF KNEE                                                | 1 (0.38)                      | 0 (0.00)                      |
| Q68.8, OTHER SPECIFIED CONGENITAL MUSCULOSKELETAL DEFORMITIES                      | 4 (1.50)                      | 0 (0.00)                      |
| Q75.0, CRANIOSYNOSTOSIS                                                            | 7 (2.63)                      | 0 (0.00)                      |
| Q75.2, HYPERTELORISM                                                               | 4 (1.50)                      | 0 (0.00)                      |



| <b>ICD diagnosis code and description</b>                                      | <b>Exposed</b>                        | <b>Unexposed</b>                      |
|--------------------------------------------------------------------------------|---------------------------------------|---------------------------------------|
|                                                                                | <b>(N=16,350)</b>                     | <b>(N=16,088)</b>                     |
|                                                                                | <b>Number of events<br/>N=266 (%)</b> | <b>Number of events<br/>N=171 (%)</b> |
| Q75.3, MACROCEPHALY                                                            | 48 (18.05)                            | 0 (0.00)                              |
| Q75.8, OTHER SPECIFIED CONGENITAL MALFORMATIONS OF SKULL AND FACE BONES        | 1 (0.38)                              | 0 (0.00)                              |
| Q76.0, SPINA BIFIDA OCCULTA                                                    | 1 (0.38)                              | 0 (0.00)                              |
| Q76.49, OTHER CONGENITAL MALFORMATIONS OF SPINE, NOT ASSOCIATED WITH SCOLIOSIS | 7 (2.63)                              | 0 (0.00)                              |
| Q76.7, CONGENITAL MALFORMATION OF STERNUM                                      | 1 (0.38)                              | 0 (0.00)                              |
| Q79.0, CONGENITAL DIAPHRAGMATIC HERNIA                                         | 2 (0.75)                              | 0 (0.00)                              |
| Q79.1, OTHER CONGENITAL MALFORMATIONS OF DIAPHRAGM                             | 2 (0.75)                              | 0 (0.00)                              |
| Q79.2, EXOMPHALOS                                                              | 5 (1.88)                              | 0 (0.00)                              |
| Q79.3, GASTROSCHISIS                                                           | 6 (2.26)                              | 0 (0.00)                              |
| Q79.59, OTHER CONGENITAL MALFORMATIONS OF ABDOMINAL WALL                       | 9 (3.38)                              | 0 (0.00)                              |
| Q79.8, OTHER CONGENITAL MALFORMATIONS OF MUSCULOSKELETAL SYSTEM                | 1 (0.38)                              | 0 (0.00)                              |
| Q79.9, CONGENITAL MALFORMATION OF MUSCULOSKELETAL SYSTEM, UNSPECIFIED          | 1 (0.38)                              | 0 (0.00)                              |

**Table S8. Congenital Anomalies Of Integument**

| ICD diagnosis code and description                            | Exposed<br>(N=16,350)         | Unexposed<br>(N=16,088)       |
|---------------------------------------------------------------|-------------------------------|-------------------------------|
|                                                               | Number of events<br>N=949 (%) | Number of events<br>N=477 (%) |
| <b>ICD-9 Codes</b>                                            |                               |                               |
| 757.1, ICHTHYOSIS CONGENITA                                   | 0 (0.00)                      | 5 (1.05)                      |
| 757.2, DERMATOLYPHIC ANOMALIES                                | 0 (0.00)                      | 3 (0.63)                      |
| 757.32, VASCULAR HAMARTOMAS                                   | 0 (0.00)                      | 102 (21.38)                   |
| 757.33, CONGENITAL PIGMENTARY ANOMALIES OF SKIN               | 0 (0.00)                      | 218 (45.70)                   |
| 757.39, OTHER SPECIFIED ANOMALIES OF SKIN                     | 0 (0.00)                      | 110 (23.06)                   |
| 757.4, SPECIFIED ANOMALIES OF HAIR                            | 0 (0.00)                      | 2 (0.42)                      |
| 757.6, SPECIFIED CONGENITAL ANOMALIES OF BREAST               | 0 (0.00)                      | 29 (6.08)                     |
| 757.8, OTHER SPECIFIED ANOMALIES OF THE INTEGUMENT            | 0 (0.00)                      | 6 (1.26)                      |
| 757.9, UNSPECIFIED CONGENITAL ANOMALY OF THE INTEGUMENT       | 0 (0.00)                      | 3 (0.63)                      |
| <b>ICD-10 Codes</b>                                           |                               |                               |
| Q80.1, X-LINKED ICHTHYOSIS                                    | 1 (0.11)                      | 0 (0.00)                      |
| Q80.2, LAMELLAR ICHTHYOSIS                                    | 1 (0.11)                      | 0 (0.00)                      |
| Q81.9, EPIDERMOLYSIS BULLOSA, UNSPECIFIED                     | 1 (0.11)                      | 0 (0.00)                      |
| Q82.5, CONGENITAL NON-NEOPLASTIC NEVUS                        | 203 (21.39)                   | 1 (0.21)                      |
| Q82.6, CONGENITAL SACRAL DIMPLE                               | 345 (36.35)                   | 0 (0.00)                      |
| Q82.8, OTHER SPECIFIED CONGENITAL MALFORMATIONS OF SKIN       | 401 (42.26)                   | 4 (0.84)                      |
| Q82.9, CONGENITAL MALFORMATION OF SKIN, UNSPECIFIED           | 1 (0.11)                      | 0 (0.00)                      |
| Q83.3, ACCESSORY NIPPLE                                       | 28 (2.95)                     | 1 (0.21)                      |
| Q84.0, CONGENITAL ALOPECIA                                    | 1 (0.11)                      | 0 (0.00)                      |
| Q84.2, OTHER CONGENITAL MALFORMATIONS OF HAIR                 | 2 (0.21)                      | 0 (0.00)                      |
| Q84.8, OTHER SPECIFIED CONGENITAL MALFORMATIONS OF INTEGUMENT | 11 (1.16)                     | 0 (0.00)                      |

## **Supplementary Figures**

Secular Trends of Congenital Anomalies of Various Systems Among Kaiser Permanente Southern California (KPSC) Live-Born Infants, Irrespective of Tetanus, Diphtheria, Acellular Pertussis (Tdap) Vaccination Status During Pregnancy.

**Figure S1. Congenital Anomalies of Nervous System**

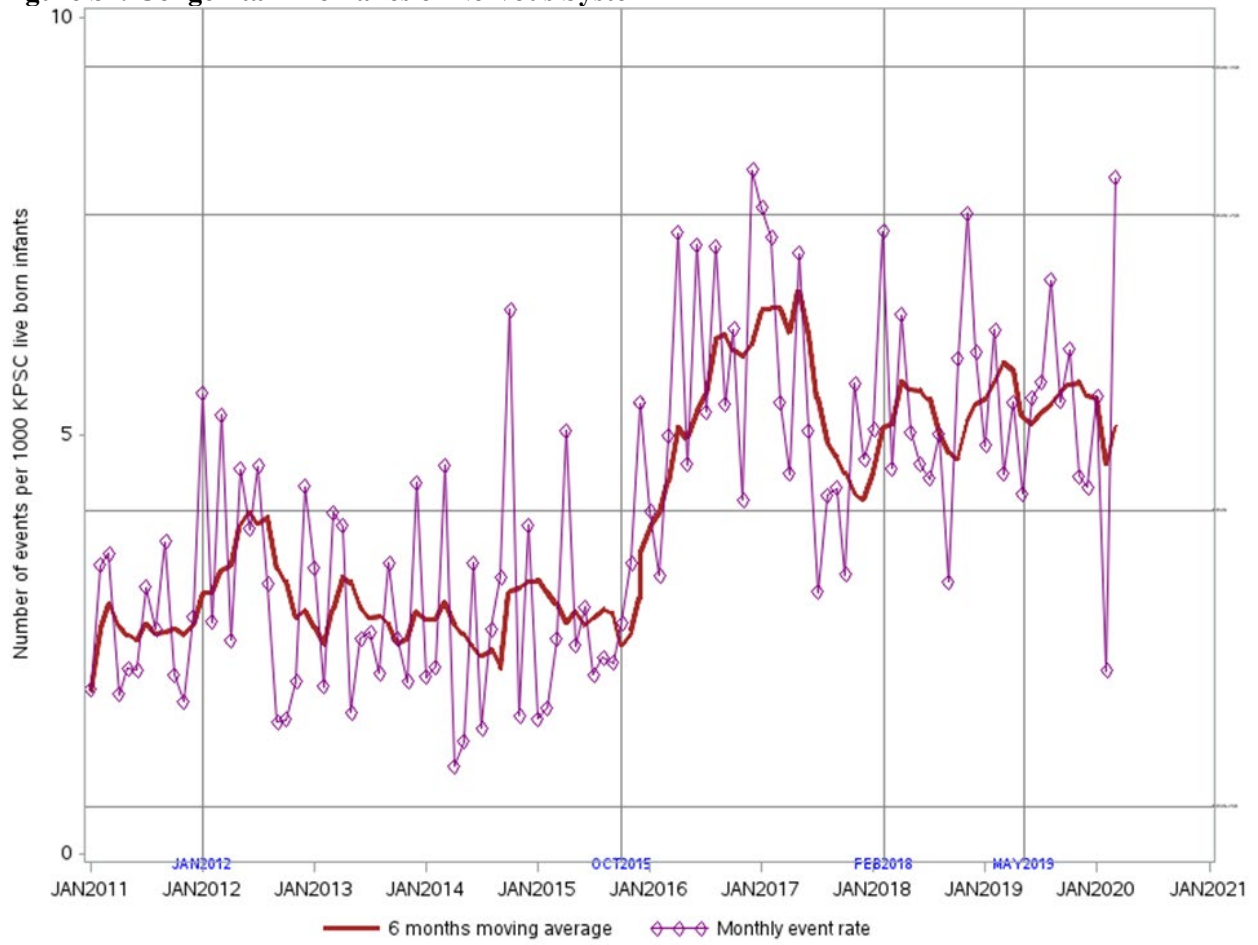

**Figure S2. Congenital Anomalies of Eye**

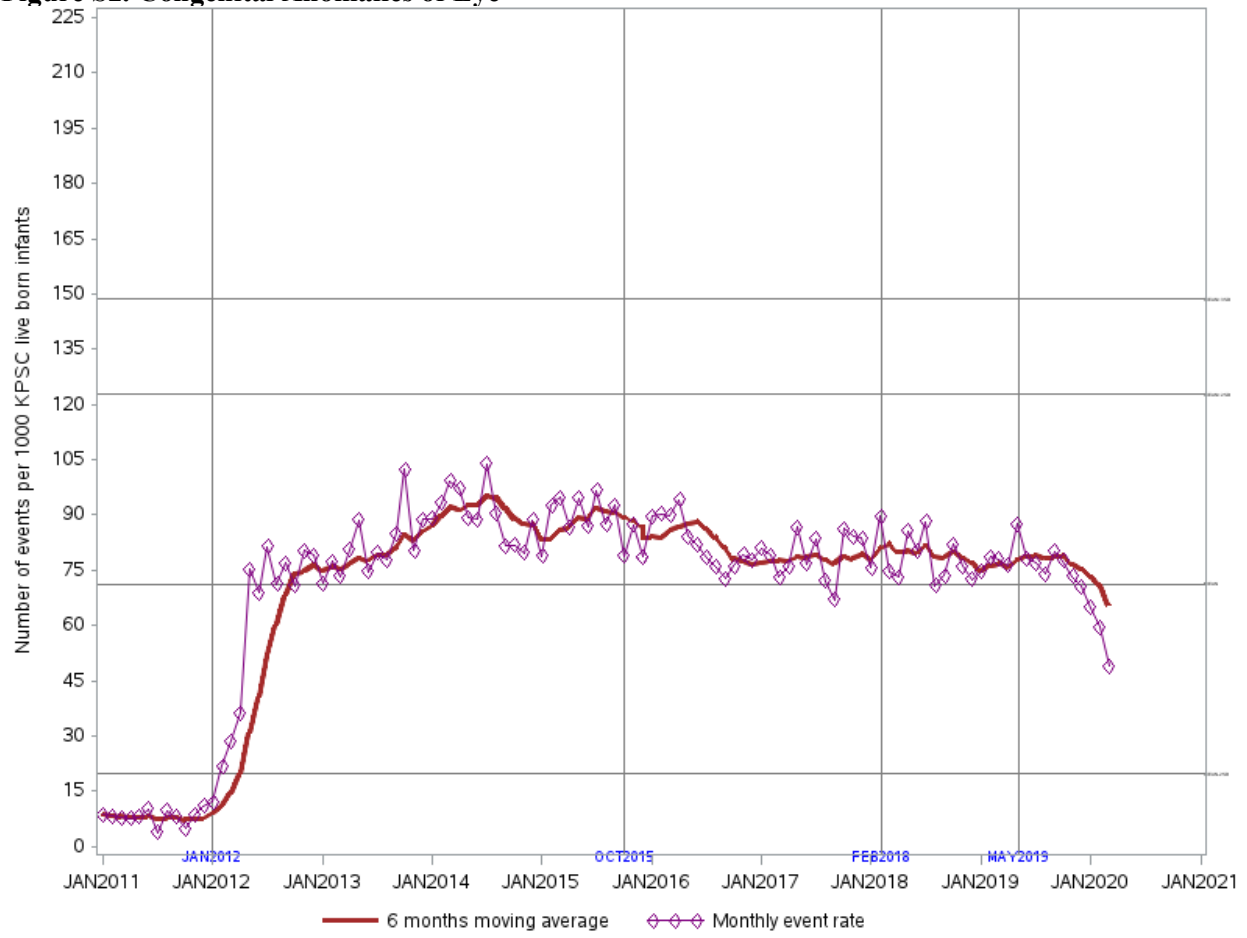

**Figure S3. Congenital Anomalies of Ear, Face, and Neck**

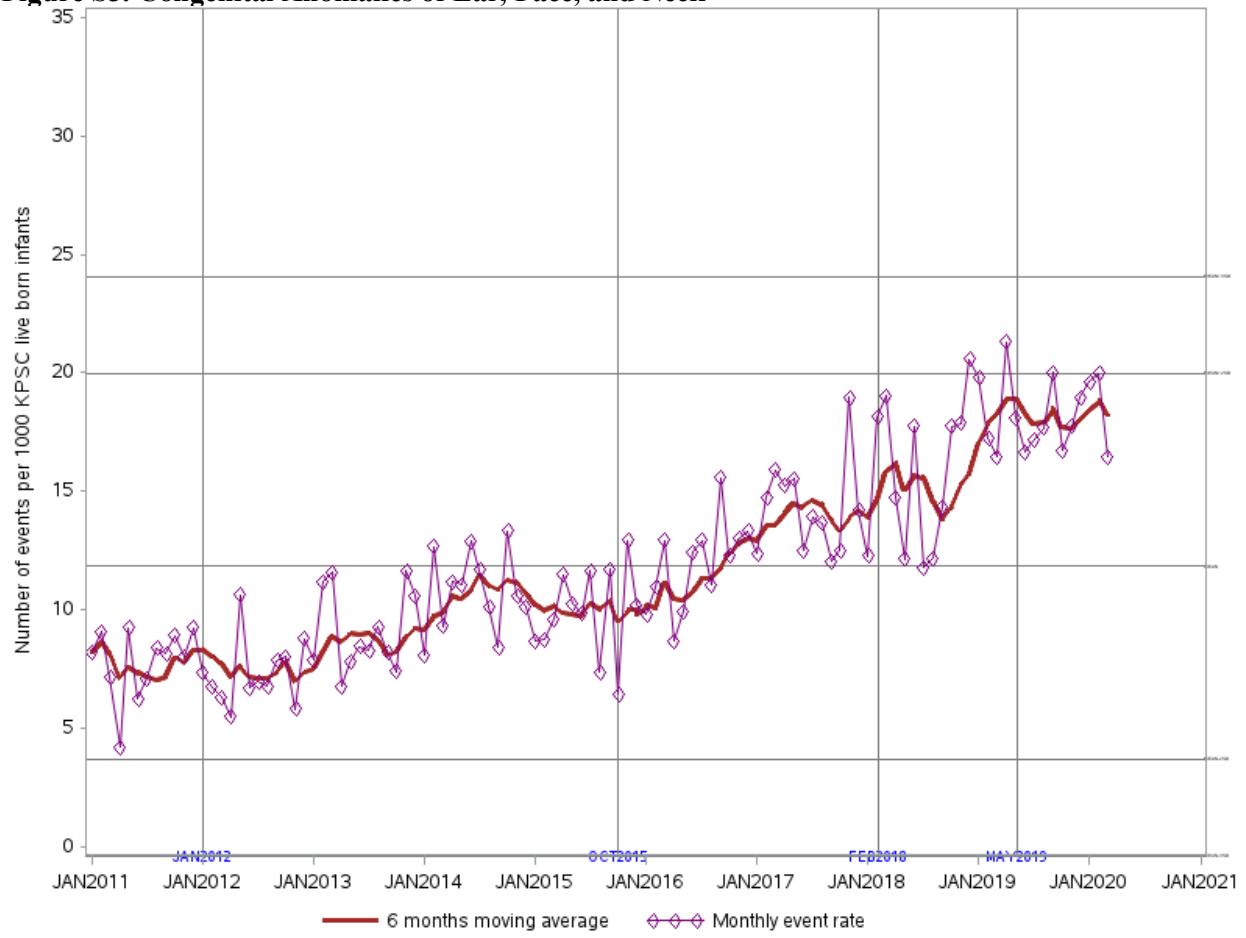

**Figure S4. Congenital Anomalies of Cardiovascular System**

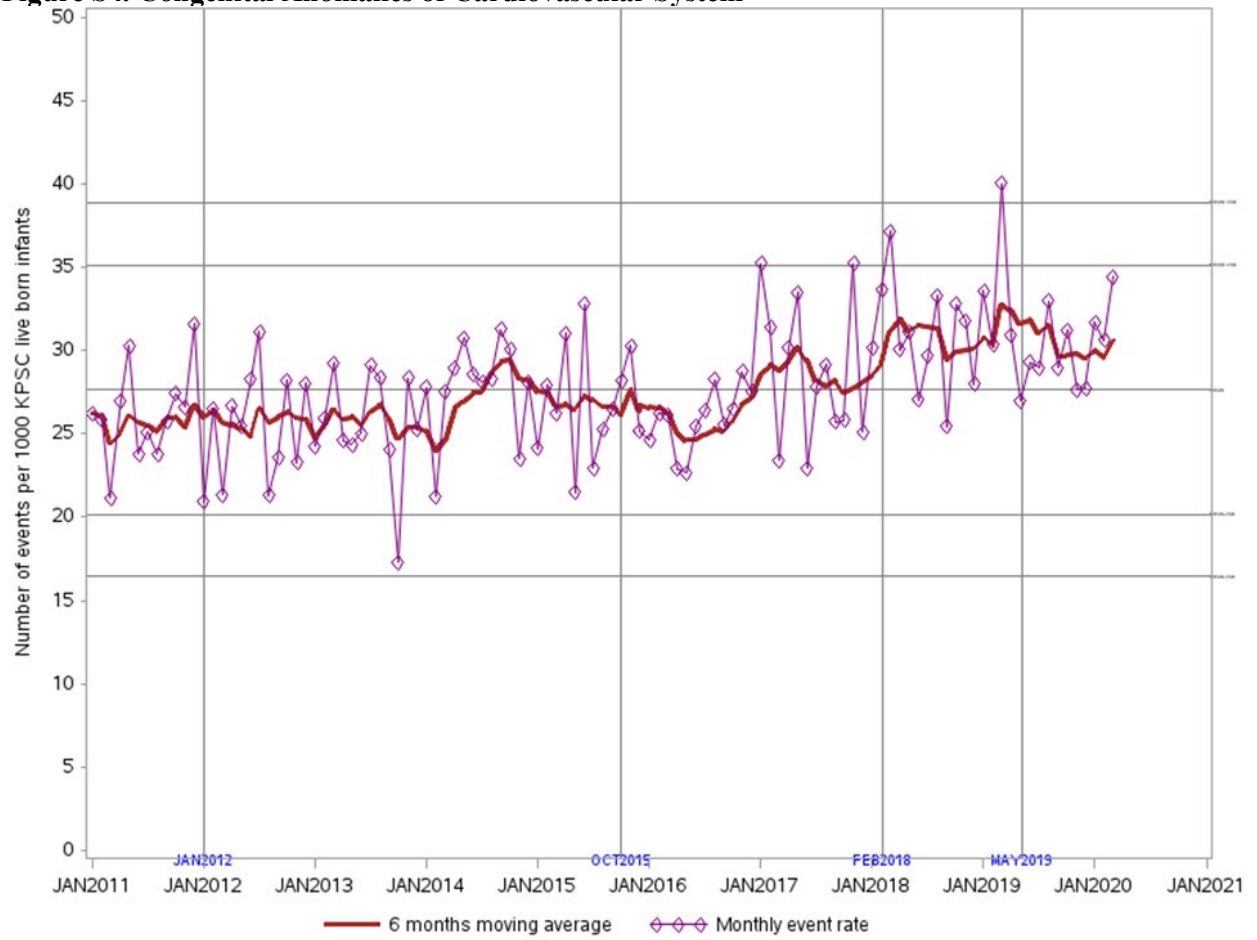

Figure S5. Congenital Anomalies of Respiratory System

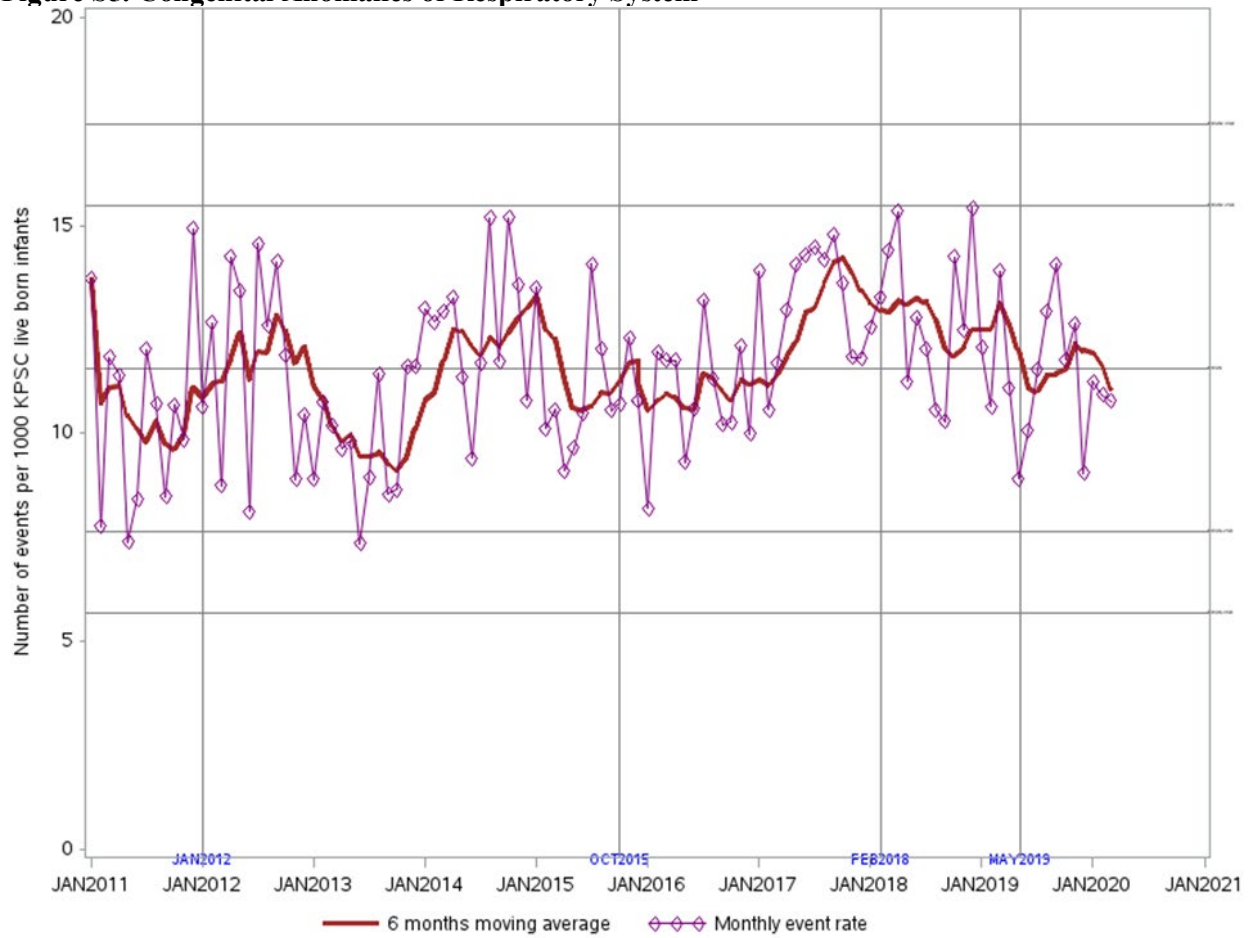



**Figure S6. Clefts**

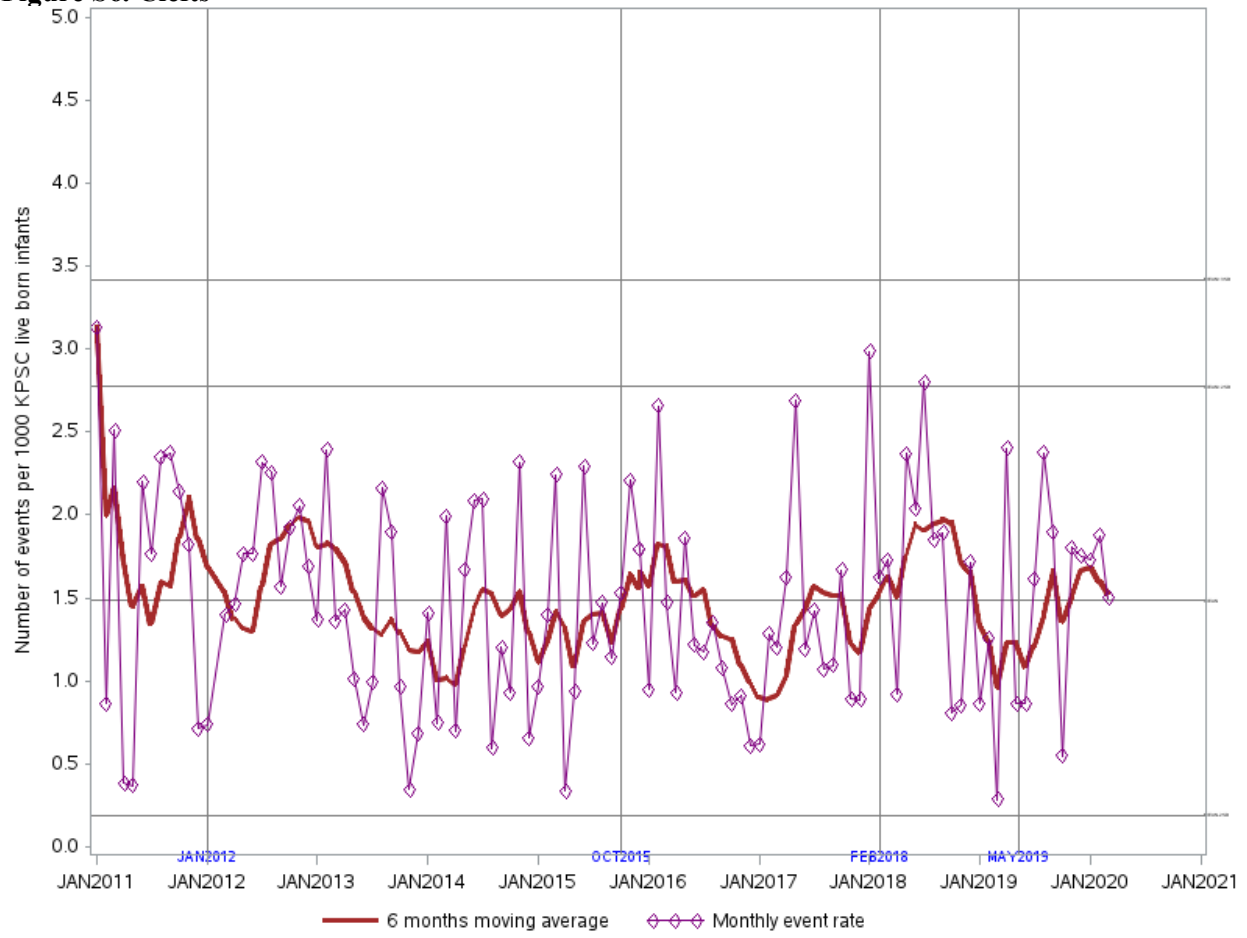

**Figure S7. Congenital Anomalies of Upper Gastrointestinal System**

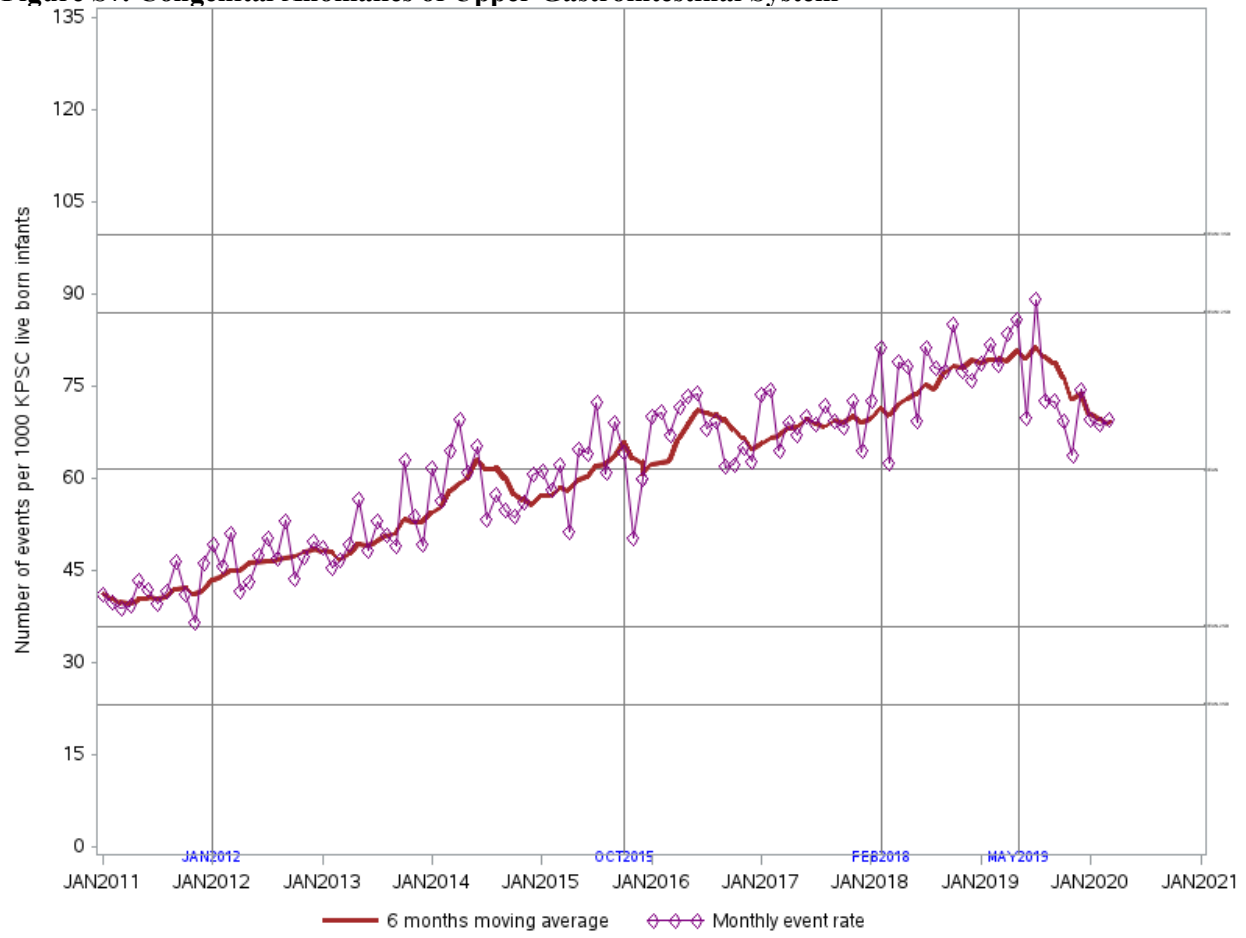

**Figure S8. Congenital Anomalies of Lower Gastrointestinal System**

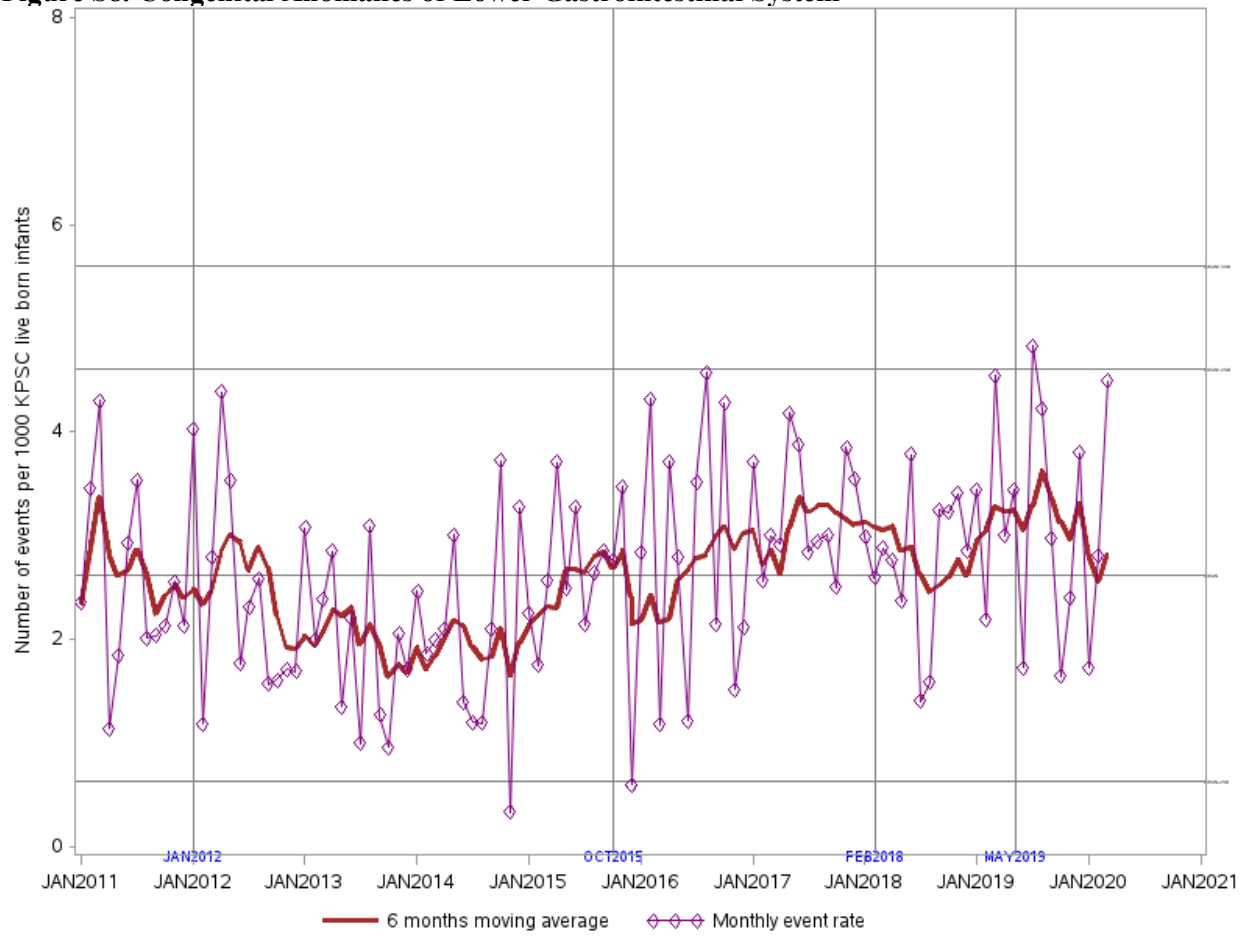

**Figure S9. Congenital Anomalies of Genital System**

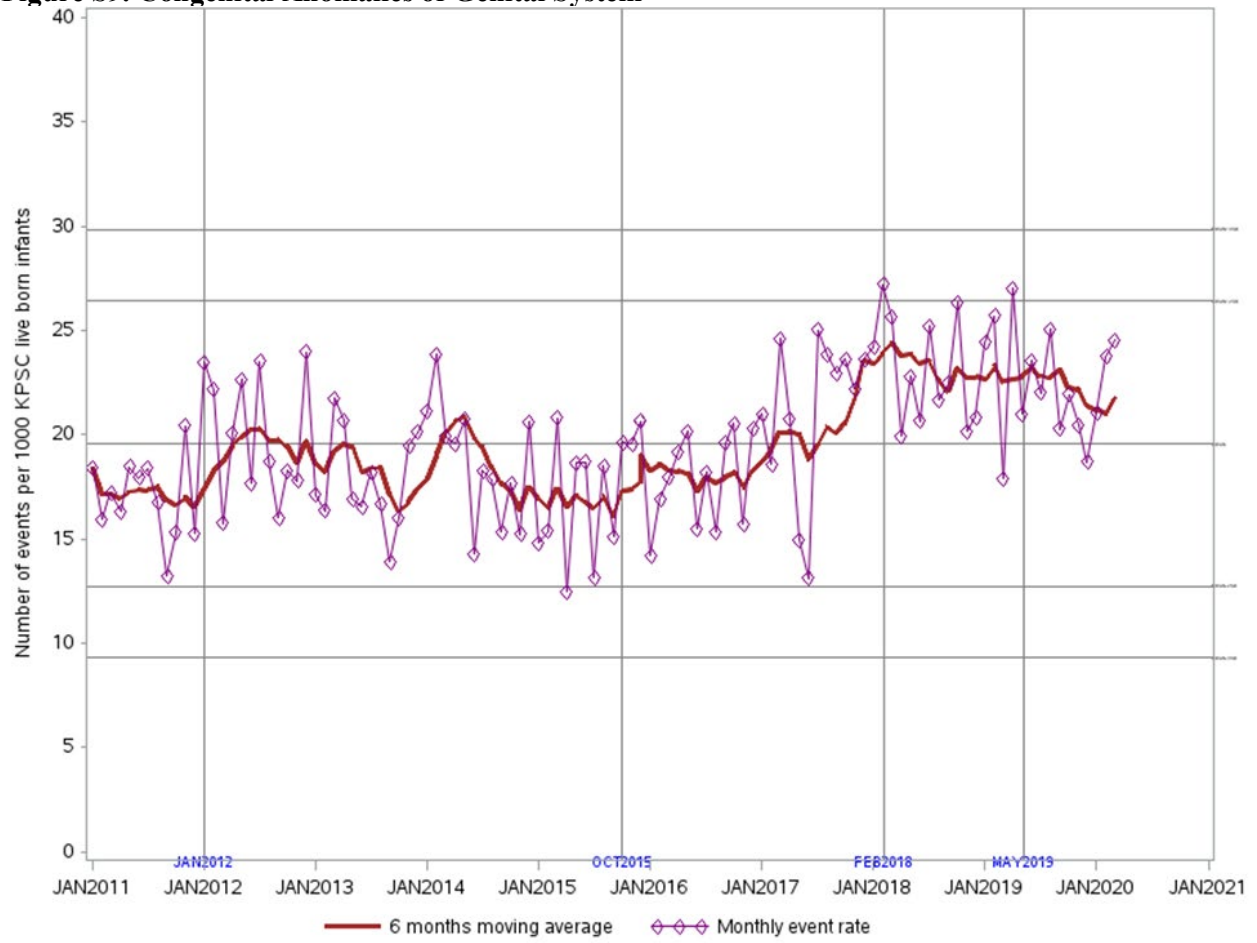

**Figure S10. Congenital Anomalies of Renal System**

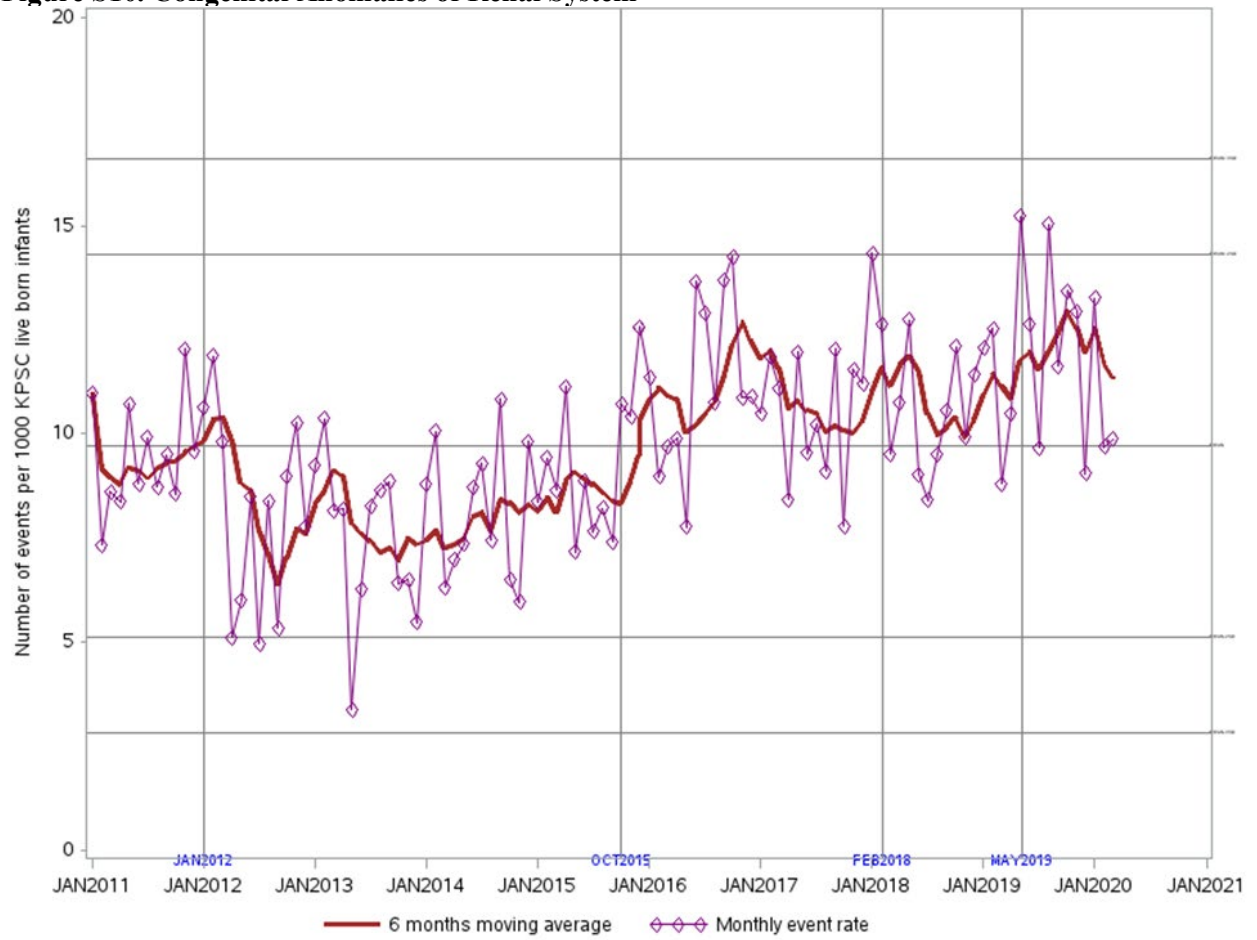

**Figure S11. Congenital Anomalies of Musculoskeletal System**

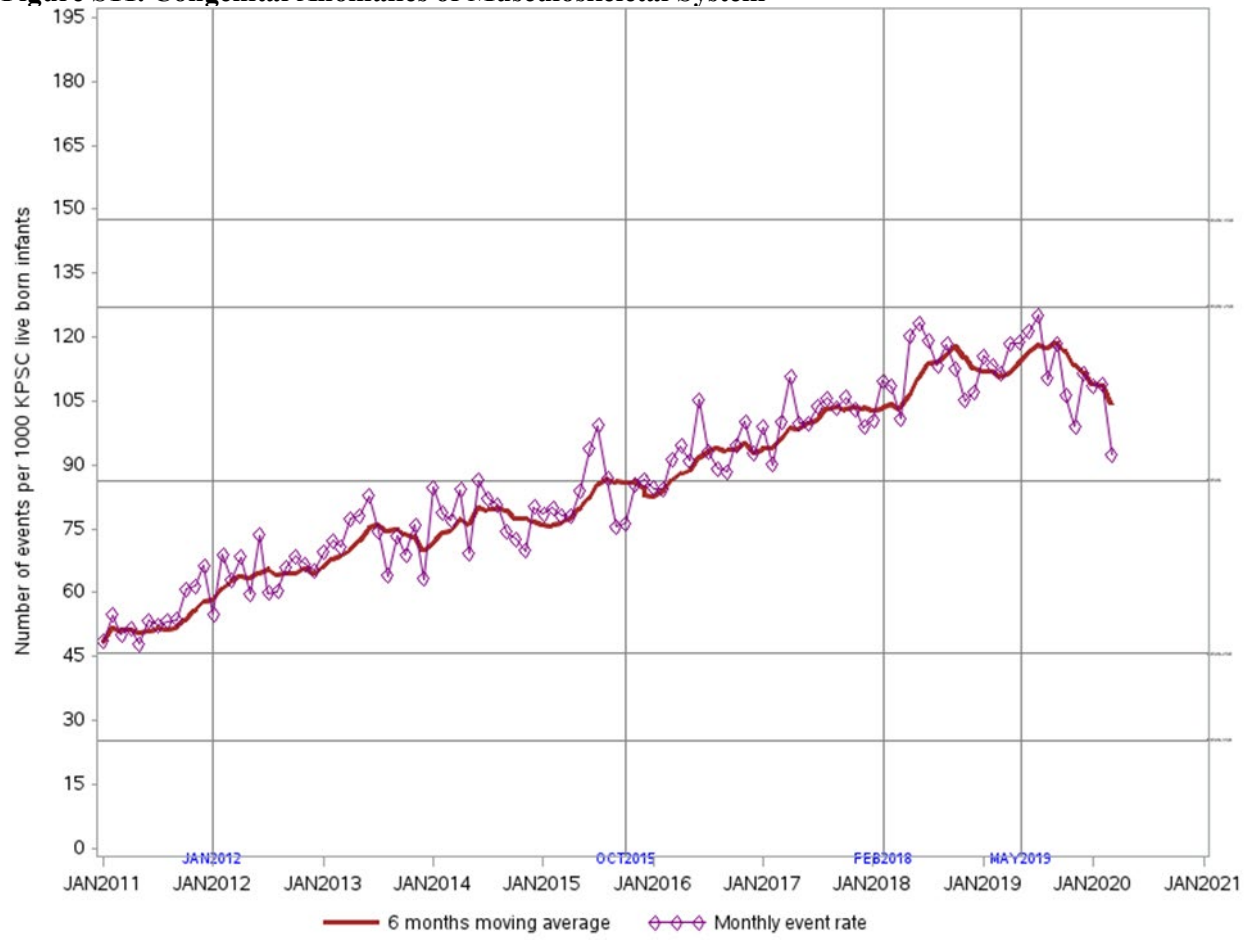

**Figure S12. Congenital Anomalies of Limb**

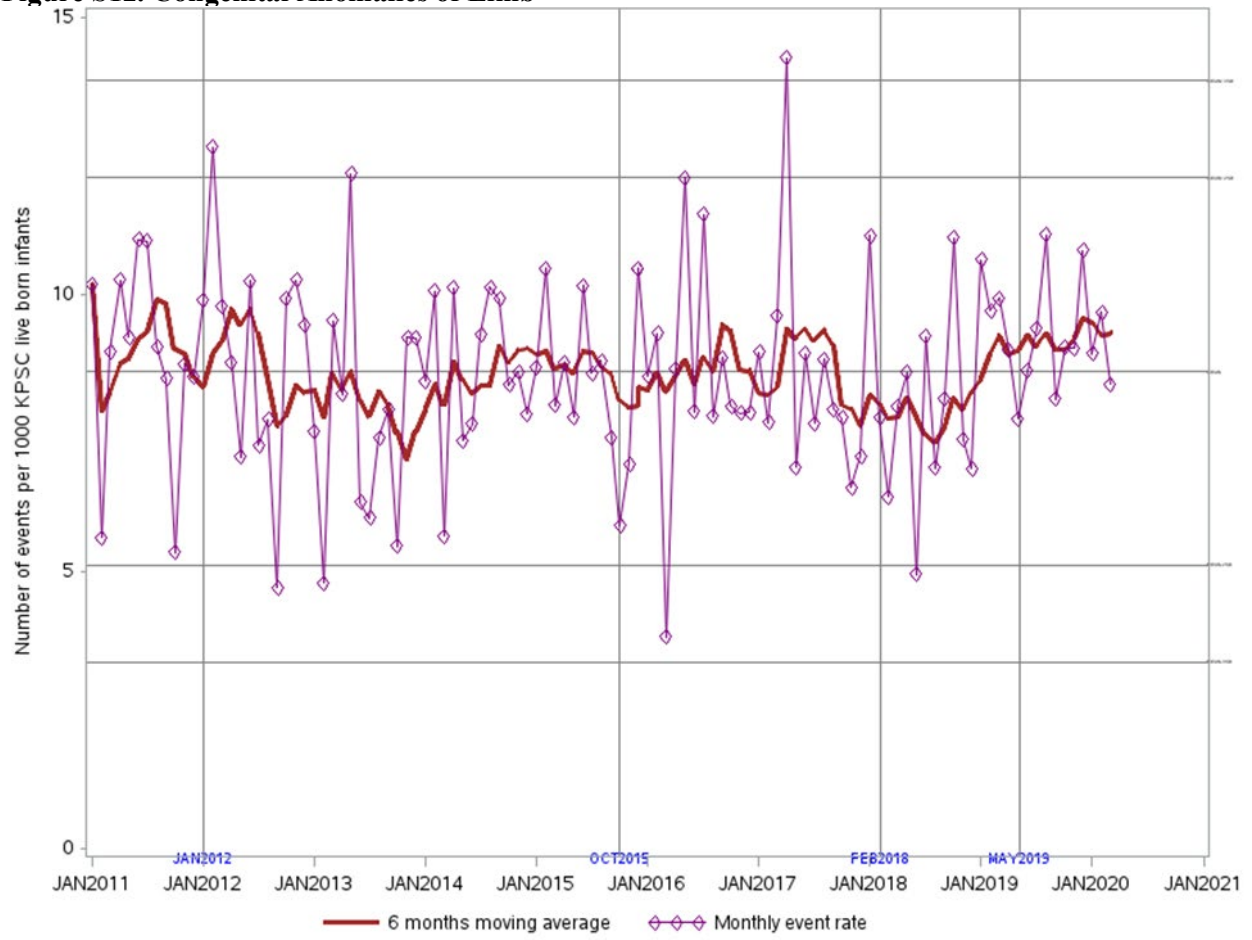

**Figure S13. Congenital Anomalies of Integument**

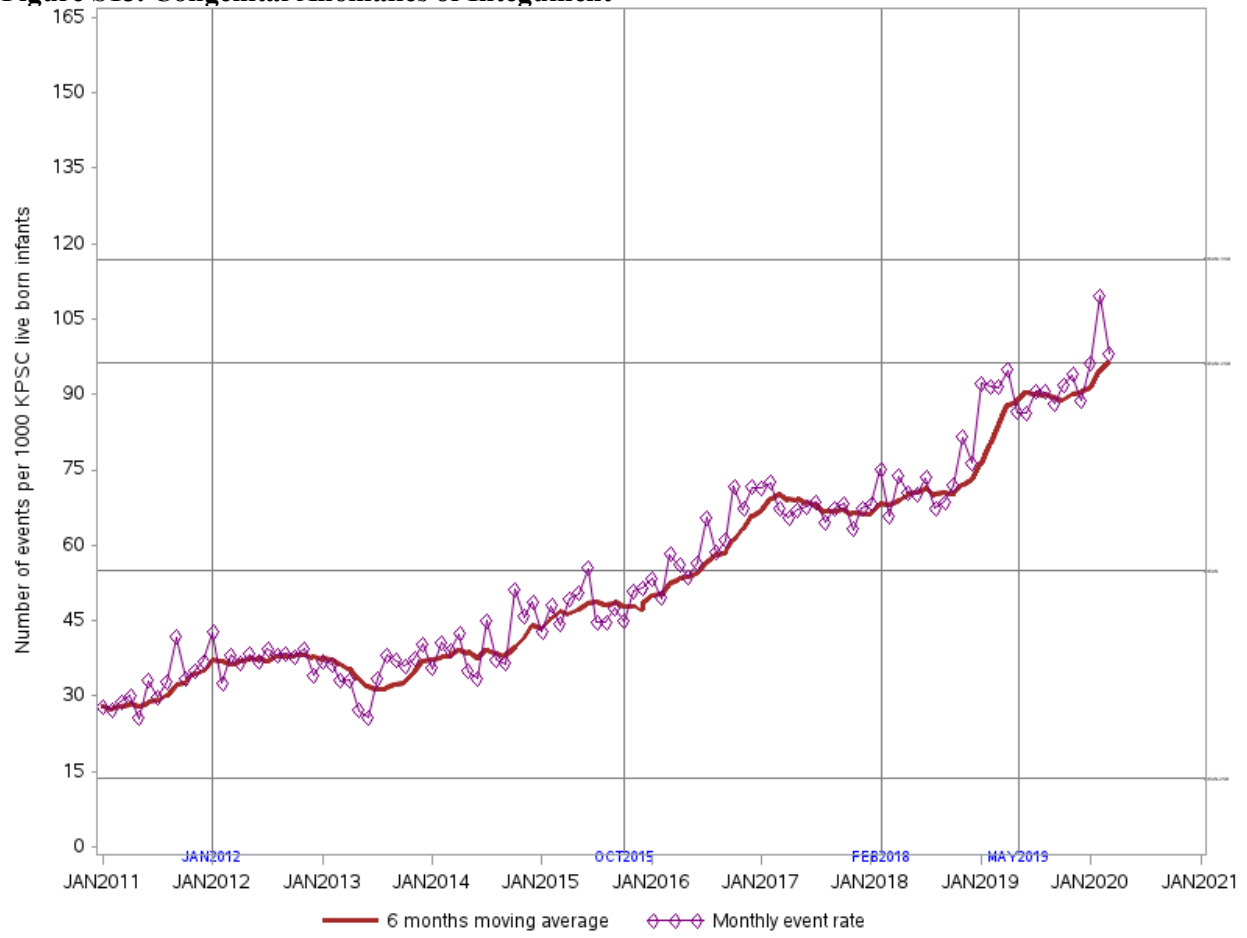



**Figure S14. Other and Unspecified Congenital Anomalies**

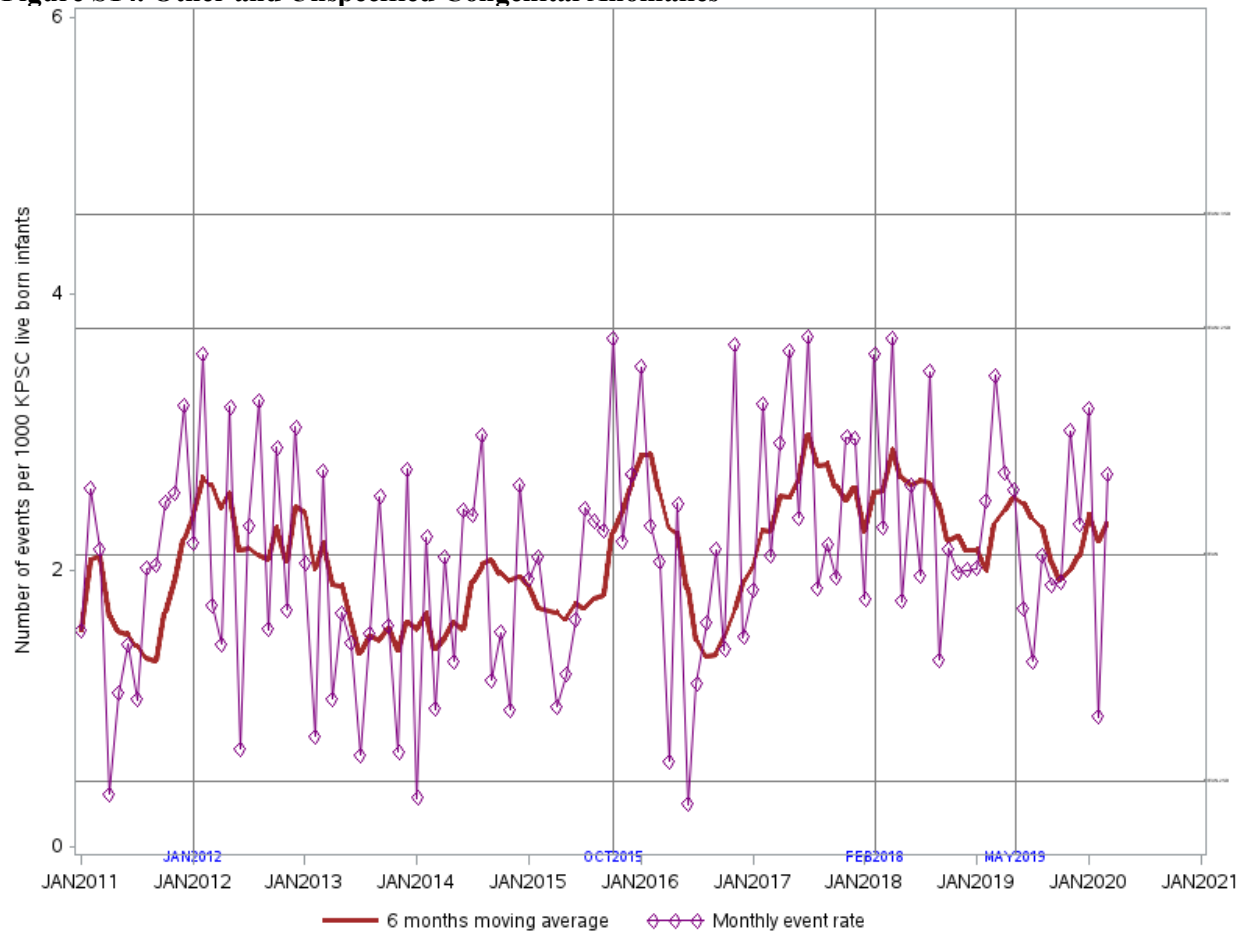

Supplement: MOESM1 [file 23830788]
